# Supplementary material for: Glycoengineered anti-CD39 promotes anticancer responses by depleting suppressive cells and inhibiting angiogenesis in tumor models
Source: J Clin Invest. 2022 Jul 1;132(13):e157431. doi: 10.1172/JCI157431 (PMC9246388; doi:10.1172/JCI157431)
Supplement: Supplemental data [file jci-132-157431-s151.pdf]

## Supplemental figures:

A

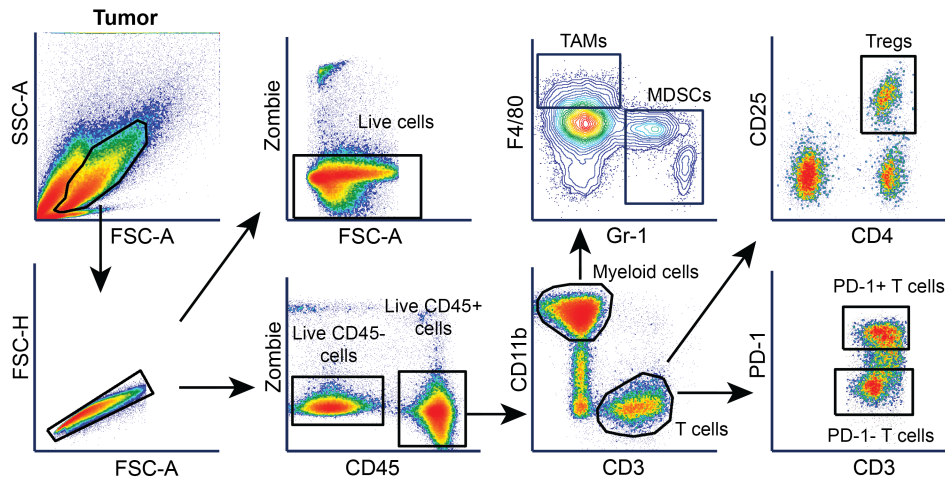

B

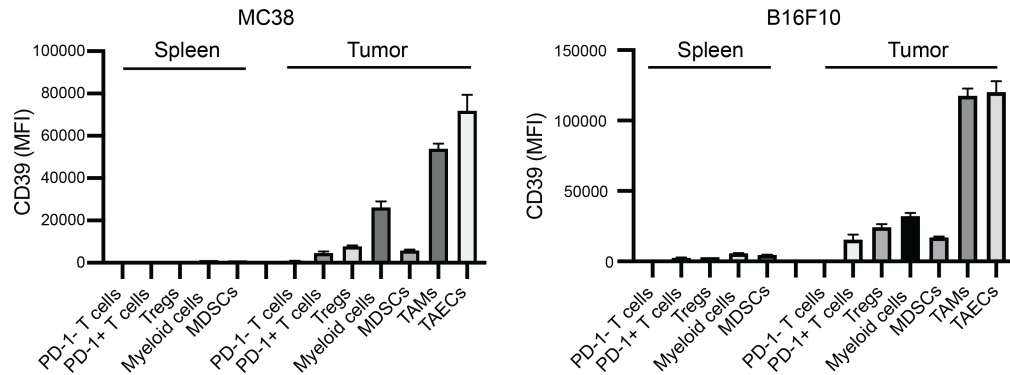

C

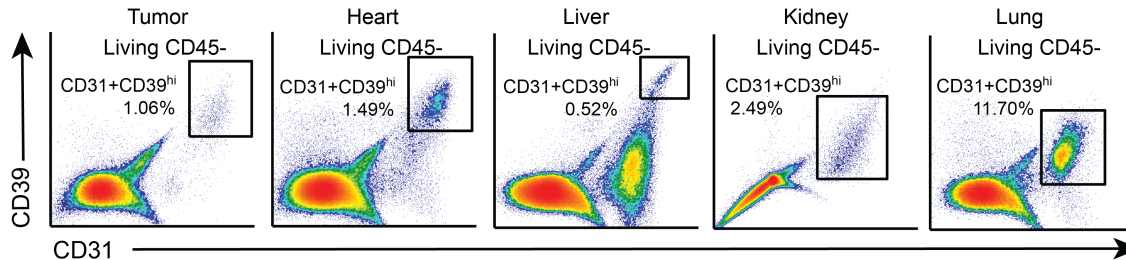

**Supplemental figure 1. CD39 expression on tumor-associated endothelial cells (TAECS) and tumor-associated macrophages (TAMs).**

$1 \times 10^5$  MC38 or B16F10 tumor cells were injected subcutaneously into WT C57BL/6 mice. Tissues were harvested on Day 11 (MC38) and Day 14 (B16F10) post tumor cells inoculation.

(A) Gating strategy of FACS analysis.

(B) Quantification of CD39 median fluorescence intensity (MFI) on different cell subsets in tumor and spleen.

(C) Representative FACS plots showing CD39 MFI on endothelial cells of different organs from MC38 tumor-bearing mice.

Data are representative of at least two independent experiments (B-C).

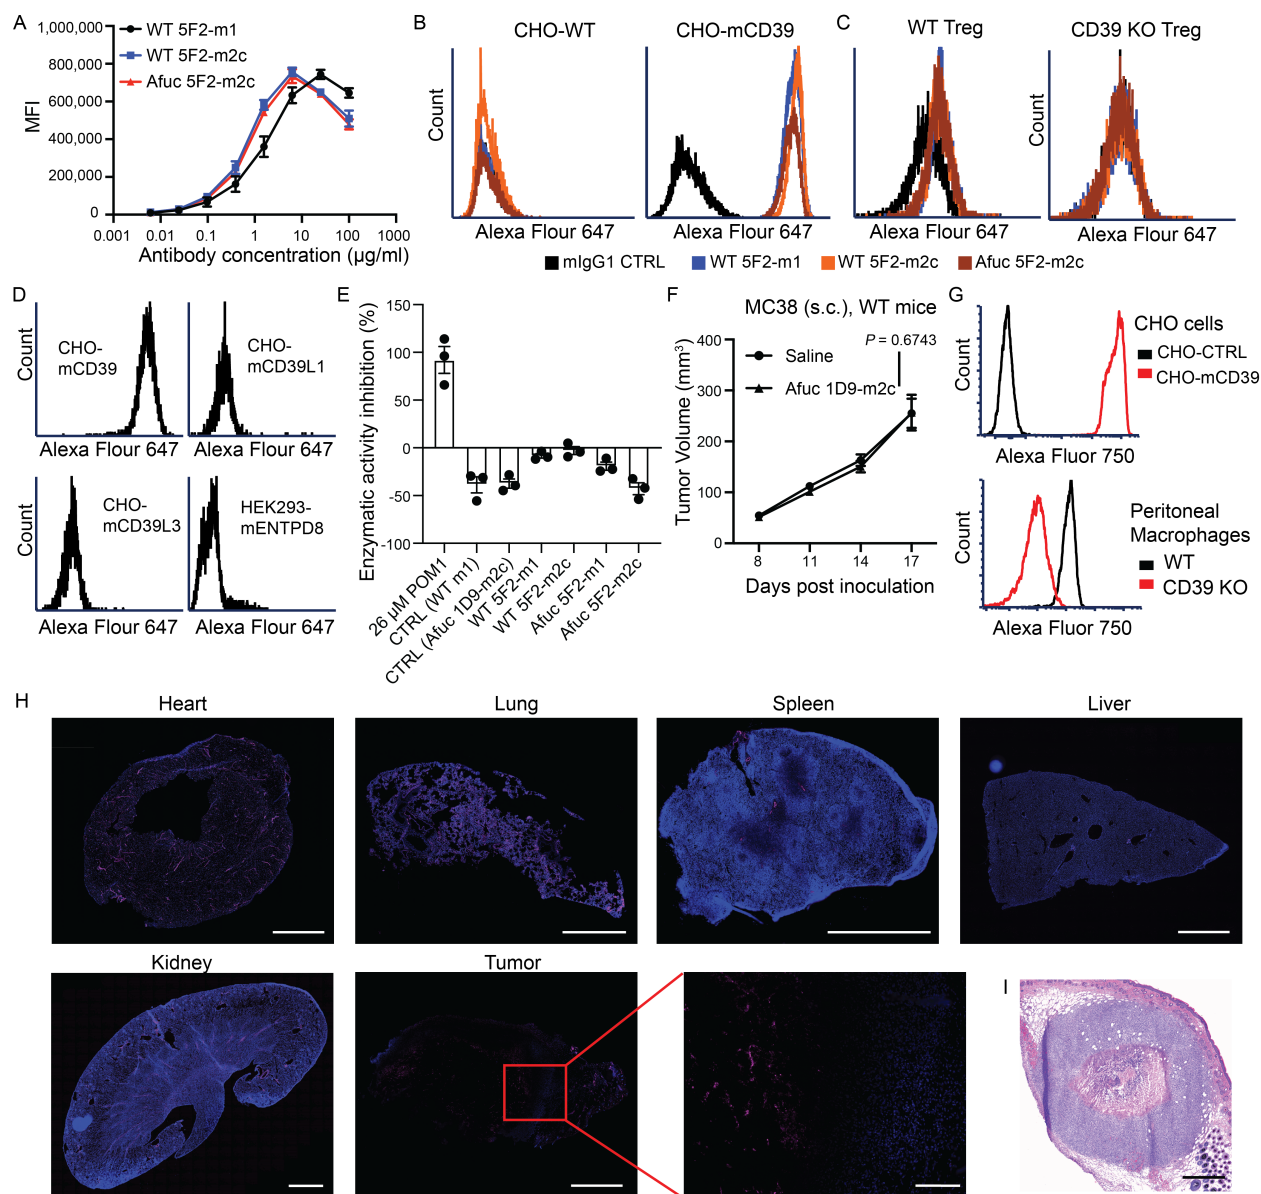

**Supplemental figure 2. Antibody isotype-switching and genetic engineering of the hybridomas does not alter the binding affinity and specificity of the antibodies.**

(A) Binding of indicated mouse anti-mCD39 antibody (clone 5F2) Fc variants on CHO-mCD39 was assessed by FACS analysis. Data are represented as mean  $\pm$  s.d..

(B-C) Binding of different anti-mCD39 antibody (clone 5F2) Fc variants to CHO wild type (WT), CHO expressing mouse CD39 cells and Treg cells from the spleen of WT or CD39 KO mice assessed by FACS analysis.

(D) Binding of Afuc 5F2-m2c to CHO cells expressing different members of the ectonucleoside triphosphate diphosphohydrolase family, as assessed by FACS analysis.

(E) Impact of different 5F2 antibody Fc variants on CD39 activity of mouse peritoneal macrophages assessed by luminescent assay.

(F)  $1 \times 10^5$  MC38 cells were inoculated subcutaneously into the right flank of the mice (Day 0). MC38-bearing mice received treatment of saline or 5 mg/kg of Ab on Days 8, 11, 14, and 17. Saline (n = 5), Afuc 1D9-m2c (n = 5). Tumor growth was assessed.

Data were shown as mean  $\pm$  s.e.m. (E-F); Two-way ANOVA was used for statistical analysis (F).

(G) Binding of Alexa-Fluor 750 labeled  $\alpha$ CD39 mAb to CHO wild type (WT), CHO expressing mouse CD39 cells and peritoneal macrophages from WT or CD39 KO mice assessed by FACS analysis.

(H) Large field of views of tumor and other organs in Figure 2H. Scale bar: 1000  $\mu$ m (large views of tissues), and 200  $\mu$ m (magnified view of tumor).

(I) H&E staining of tumor in Figure 2H. Scale bar: 500  $\mu$ m.

Data are representative of at least two independent experiments (A-I).

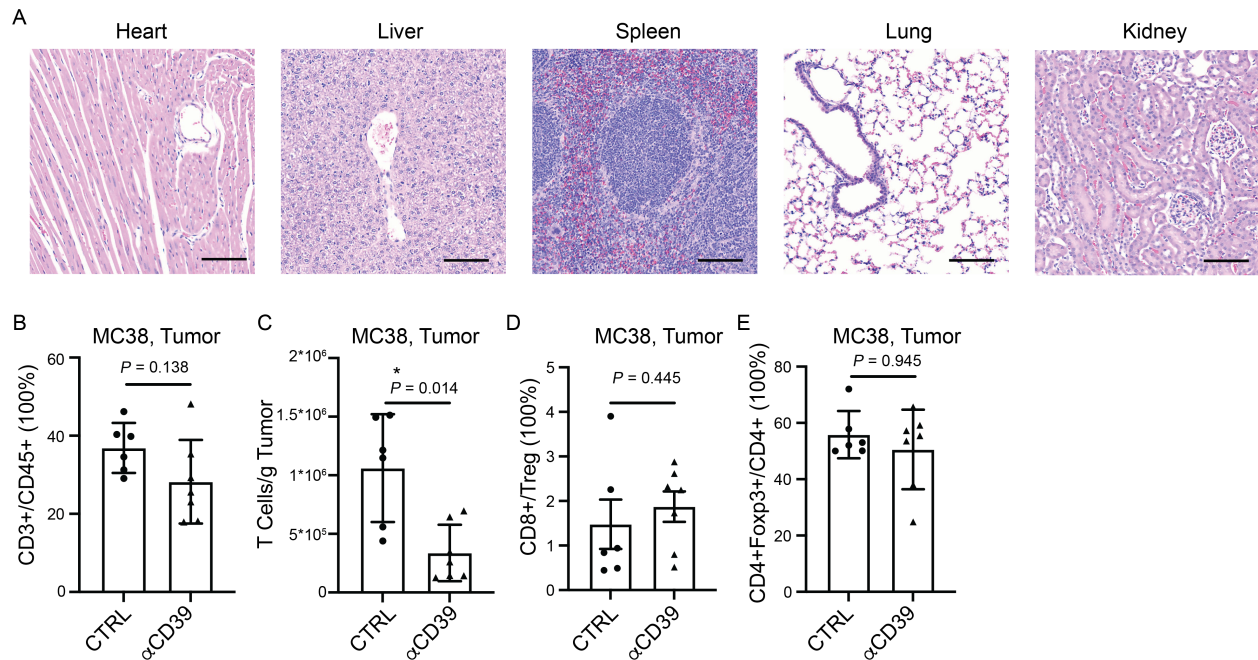

**Supplemental figure 3.  $\alpha$ CD39 mAb induced cell depletion is selective.**

(A) Two doses (200  $\mu$ g per mouse) of  $\alpha$ CD39 mAb were injected intraperitoneally every two days into five healthy C57BL/6 WT mice. Tissues were harvested one day after the second dose of treatment and subjected to IHC analysis. Representative IHC images of the heart, liver, spleen, lung, and kidney of treated mice ( $n = 5$ ) are shown. Scale bar: 100  $\mu$ m.

(B-E)  $1 \times 10^5$  MC38 tumor cells were injected subcutaneously into Foxp3EGFP knock in reporter mice (Day 0). Tumor tissues were collected on Day 12 after treatment with 5 mg/kg of Ab on Days 8 and 11. Quantification of (B) T cells percentage in the tumor-infiltrating immune cells and (C) density of T cells in the tumor. Quantification of the cell ratio of CD8/Treg (D) and Treg/Teff (E) within the tumor.

Data are representative of at least two independent experiments (A-E).

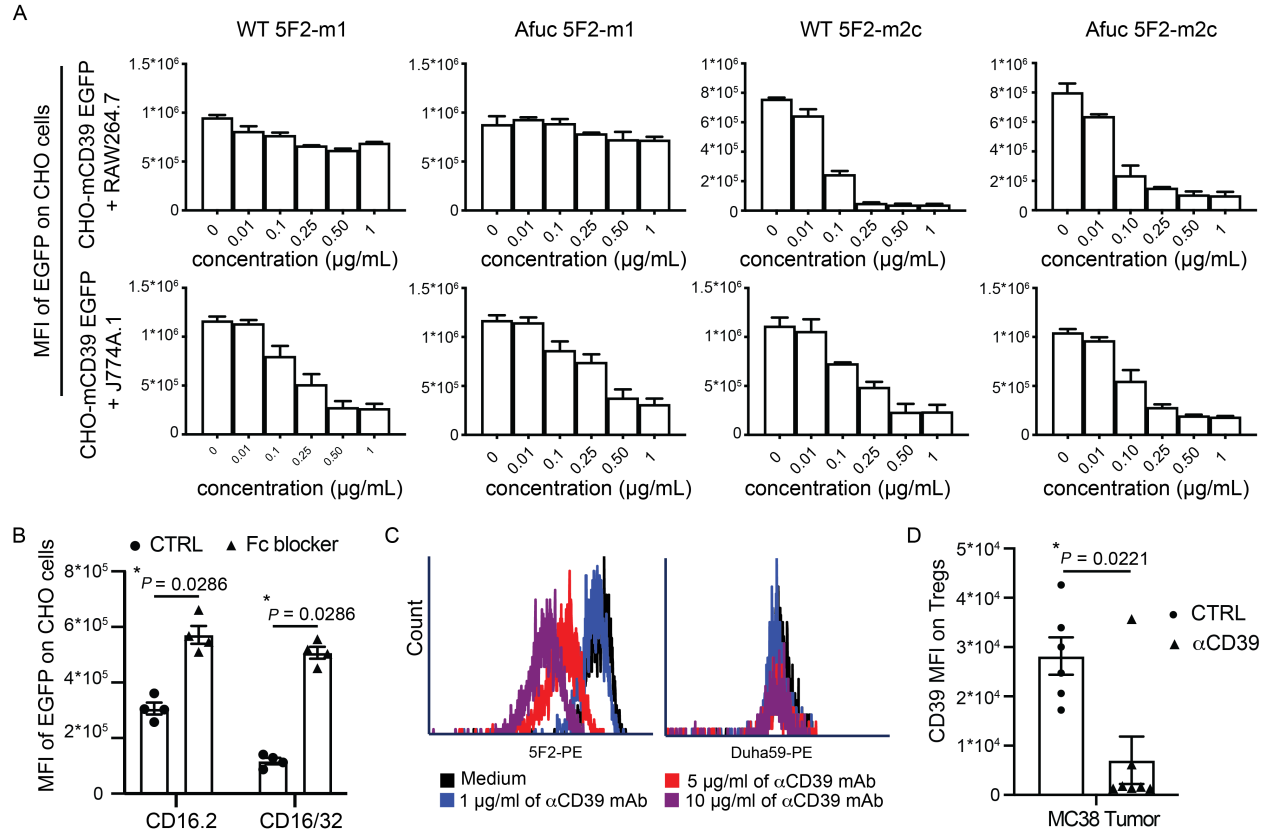

**Supplemental figure 4. Effector cells and FcγRs involved in αCD39 mAb induced trogocytosis.**

(A) CHO-mCD39-EGFP cells were cultured with either RAW264.7 cells or J774A.1 cells. The co-cultures were then treated with different mAbs concentrations as indicated. EGFP signal on CHO-mCD39-EGFP cells was quantified by FACS.

(B) Co-cultures of J774A.1 and CHO-mCD39-EGFP were pretreated with 10 µg/mL of FcBlocker™ (CD16.2 or CD16/32) or its corresponding isotype controls for 30 minutes and then incubated with αCD39 mAb for 48 hours. EGFP signal on CHO-mCD39-EGFP cells was quantified by FACS. Mann-Whitney test was used for statistical analysis. Data are shown as mean ± s.e.m.; pooled data from 4 independent experiments.

(C) CHO cells overexpressing mouse CD39 (CHO-mCD39) were incubated with the indicated amount of αCD39 mAb for 30 minutes and then were stained with different clones of fluorescence-conjugated anti-CD39 mAb. FACS analysis of the fluorescence on stained CHO-mCD39 cells.

(D) MC38 tumor-bearing mice were treated with 2 doses of 5 mg/kg of CTRL or αCD39 mAb on Days 8 and 11 post tumor implantation. Tumor tissues were harvested 24 hours after the second dose of treatment and processed for FACS analysis. Data are shown as mean ± s.e.m.; Mann-Whitney testing was used for the statistical analysis.

Data are representative of at least two independent experiments (A-D).

**Supplemental Table 1: Liver and renal toxicity studies of  $\alpha$ CD39 mAb in healthy tumor-free mice**

| Sample name | ALT(28-132mg/dl) | AST(59-247mg/dl) | BUN (18-29mg/dl) |
|-------------|------------------|------------------|------------------|
| CTX1        | 33               | 29               | 20               |
| CTX2        | 0                | 27               | 18               |
| CTX3        | 42               | 29               | 16               |
| CTX4        | 17               | 31               | 34               |
| CTX5        | 27               | 27               | 13               |
| CTX6        | 26               | 25               | 12               |
| CTX7        | 23               | 21               | 16               |
| CTX8        | 15               | 27               | 14               |
| CTX9        | 13               | 14               | 15               |
| CTX10       | 24               | 17               | 11               |

**Supplemental Table 1.** Three doses of  $\alpha$ CD39 mAb at 100  $\mu$ g (CTX5-7) or 1000  $\mu$ g (CTX8-10) were injected intraperitoneally into healthy C57BL/6 WT mice on days 1, 4, and 7. Mice received 200  $\mu$ l of saline (CTX1) or 100  $\mu$ g of IgG2c isotype control antibody (CTX2-4) served as controls. Plasma samples of mice were harvested one day after the third dose of treatment and subjected to the measurement of ALT, AST and BUN concentrations.

**Supplemental Table 2: Antibody reagents**

| Reagents                                                       | Company         | Cat#        |
|----------------------------------------------------------------|-----------------|-------------|
| FITC anti-mouse CD45 Antibody                                  | BioLegend       | 103108      |
| Brilliant Violet 510™ anti-mouse CD45 Antibody                 | BioLegend       | 103138      |
| PE/Cyanine5 anti-mouse CD3 $\epsilon$ Antibody                 | BioLegend       | 100310      |
| Brilliant Violet 421™ anti-mouse CD3 Antibody                  | BioLegend       | 100228      |
| Alexa Fluor® 700 anti-mouse CD4 Antibody                       | BioLegend       | 100536      |
| APC/Fire™ 750 anti-mouse CD4 Antibody                          | BioLegend       | 100568      |
| Brilliant Violet 510™ anti-mouse CD4 Antibody                  | BioLegend       | 100559      |
| APC/Fire™ 750 anti-mouse CD4 Antibody                          | BioLegend       | 100568      |
| FITC anti-mouse CD4 Antibody                                   | BioLegend       | 100510      |
| Brilliant Violet 711™ anti-mouse CD8a Antibody                 | BioLegend       | 100759      |
| Brilliant Violet 605™ anti-mouse CD8a Antibody                 | BioLegend       | 100744      |
| PE anti-mouse TIGIT (Vstm3) Antibody                           | BioLegend       | 142104      |
| Brilliant Violet 785™ anti-mouse NK-1.1 Antibody               | BioLegend       | 108749      |
| Brilliant Violet 421™ anti-mouse CD279 (PD-1) Antibody         | BioLegend       | 135221      |
| APC anti-mouse CD279 (PD-1) Antibody                           | BioLegend       | 135210      |
| Alexa Fluor® 700 anti-mouse/human CD11b Antibody               | BioLegend       | 101222      |
| PerCP/Cyanine5.5 anti-mouse/human CD11b Antibody               | BioLegend       | 101228      |
| BV480 Rat Anti-Mouse Ly-6G and Ly-6C                           | BD Bioscience   | 746614      |
| FITC anti-mouse Ly-6G/Ly-6C (Gr-1) Antibody                    | BioLegend       | 108406      |
| APC anti-mouse CD39 Antibody                                   | BioLegend       | 143810      |
| PE/Cyanine7 anti-mouse CD39 Antibody                           | BioLegend       | 143806      |
| PE anti-mouse CD39 Antibody                                    | BioLegend       | 143804      |
| PE/Cyanine7 anti-mouse F4/80 Antibody                          | BioLegend       | 123114      |
| APC anti-mouse F4/80 Antibody                                  | BioLegend       | 123116      |
| F4/80 Antibody, anti-mouse, PerCP-Vio® 700, REAfinity™         | Miltenyi Biotec | 130-118-327 |
| Brilliant Violet 605™ anti-mouse CD274 (B7-H1, PD-L1) Antibody | BioLegend       | 124321      |
| PE/Cyanine7 anti-mouse CD274 (B7-H1, PD-L1) Antibody           | BioLegend       | 124314      |
| PE anti-mouse CD25 Antibody                                    | BioLegend       | 101904      |
| Alexa Fluor® 488 anti-mouse CD25 Antibody                      | BioLegend       | 102017      |
| Brilliant Violet 605™ anti-mouse CD31 Antibody                 | BioLegend       | 102427      |

|                                       |                                               |        |
|---------------------------------------|-----------------------------------------------|--------|
| Rat anti-mouse CD31 antibody          | BD Bioscience                                 | 550274 |
| Rabbit anti-mouse CD39 polyclonal Abs | Dr. Jean Sévigny ,Laval<br>University, Canada |        |
| Anti- mouse PD-L1antibody             | BioLegend                                     | 124329 |
| Anti-mouse CD16/CD32 antibody         | Bioxcell                                      | BE0307 |
| Anti-mouse CD16.2 antibody            | BioLegend                                     | 149502 |
| Zombie NIR™ Fixable Viability Kit     | BioLegend                                     | 423106 |

**Supplemental Video 1: Macrophages engulf CD39 on the target cells mAb induced trogocytosis**

CHO-mCD39-EGFP cells were cultured with J774A.1 cells. Live-cell imaging showing J774A.1 cells in the co-cultures that were treated with  $\alpha$ CD39 mAb remove CD39-EGFP from CHO cells and then engulf this transferred CD39-EGFP.
